# Supplementary material
Source: PubMed Central journal article supplement (PMC3189699)

## Supporting Information

### Chlorotrimethylsilane activation of acylcyanamides for the synthesis of mono-*N*-acylguanidines.

Ryan E. Looper\*, Travis J. Haussener and James B. C. Mack.

*Department of Chemistry, University of Utah,  
315 South 1400 East, Salt lake City, Utah 84112*

1. General Experimental Considerations:..... p. 1
  2. <sup>1</sup>H and <sup>13</sup>C NMR spectra for compounds 9, 8a-k:..... p. 2-19
- 

#### 1. General Experimental Considerations:

Unless otherwise noted, materials were obtained from commercial sources and used without purification. All reactions requiring anhydrous conditions were performed under a positive pressure of nitrogen using flame-dried glassware. Diisopropylamine, triethylamine, and *N,N*-diisopropylethylamine were distilled from CaH<sub>2</sub> immediately prior to use. Dichloromethane tetrahydrofuran, diethylether, toluene, and dimethylformamide were degassed with argon and passed through a solvent purification system containing either alumina or molecular sieves. *P*-Anisidine was recrystallized from hexanes/chloroform and then hexanes/ethyl acetate prior to use.

Yields were calculated for material judged homogeneous by thin-layer chromatography and <sup>1</sup>H NMR. Thin-layer chromatography was performed on silica plates eluting with the solvents indicated, visualized by a 254 nm UV lamp, and stained with either an ethanolic solution of 12-molybdophosphoric acid, *p*-anisaldehyde, or KMnO<sub>4</sub>. Flash column chromatography was performed with slurry-packed silica gel with solvents indicated in glass columns. <sup>1</sup>H NMR spectra were recorded at 300, 400, or 500 MHz as indicated. The chemical shifts (δ) of proton resonances are reported relative to CHCl<sub>3</sub>, DMSO-*d*<sub>5</sub>, HOD, or HD<sub>2</sub>CO using the following format: chemical shift [multiplicity (s = singlet, d = doublet, t = triplet, q = quartet, m = multiplet, app = apparent), coupling constant(s) (*J* in Hz), integral].<sup>1,2</sup> <sup>13</sup>C NMR spectra were recorded at 75, 100, or 125 MHz. The chemical shifts of carbon resonances are reported relative to the deuterated solvent peak.<sup>1</sup> Infrared spectra were recorded on an IR spectrometer fitted with a SmartOrbit sample system. All absorptions are reported in cm<sup>-1</sup> relative to polystyrene. Mass spectra were obtained by ESI/APCI for LRMS or ESI/APCI-TOF for HRMS.

<sup>1</sup> Gottlieb, H. E.; Kotlyar, V.; Nudelman, A. *J. Org. Chem.* **1997**; 62(21); 7512-7515.

<sup>2</sup> Hoye, T.R.; Hansen, P.R.; Vyvyan, J.R. *J. Org. Chem.* **1994**; 59(15); 4096-4103.

## 2. <sup>1</sup>H and <sup>13</sup>C NMR spectra for compounds 9, 8a-k:

RELI272-KCBZCN-DMSO-500MHz

Pulse Sequence: s2pul

Solvent: DMSO

Temp. 25.0 C / 298.1 K

File: RE\_L272-KCBZCN-DMSO-500MHz

INOVA-500 "nmr-sun"

Pulse 33.5 degrees

Acq. time 1.892 sec

Width 5000.0 Hz

16 repetitions

OBSERVE H1, 499.8160682 MHz

DATA PROCESSING

FT size 32768

Total time 0 min, 30 sec

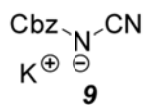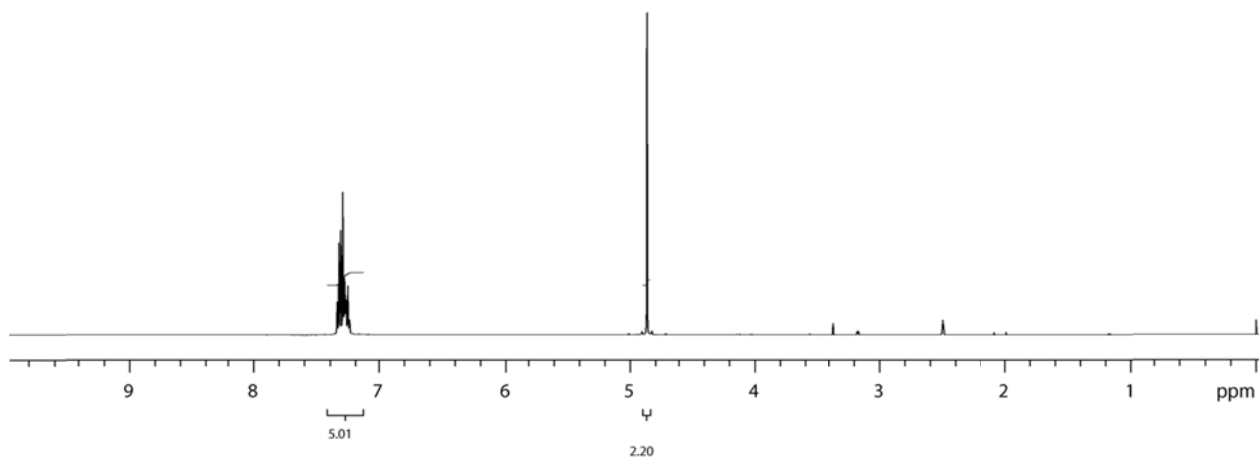

RELI272-KCBZCN-DMSO-13C-125MHz

Pulse Sequence: s2pul

Solvent: DMSO

Temp. 25.0 C / 298.1 K

User: 1-14-87

File: REI1272-KCBZCN-DMSO-13C-125MHz

INOVA-500 "nmr-sun"

Relax. delay 0.500 sec

Pulse 13.1 degrees

Acq. time 1.300 sec

Width 25000.0 Hz

336 repetitions

OBSERVE C13, 125.6789077 MHz

DECOUPLE H1, 499.8185729 MHz

Power 44 dB

continuously on

WALTZ-16 modulated

DATA PROCESSING

Line broadening 0.5 Hz

FT size 55536

Total time 30 min, 9 sec

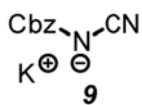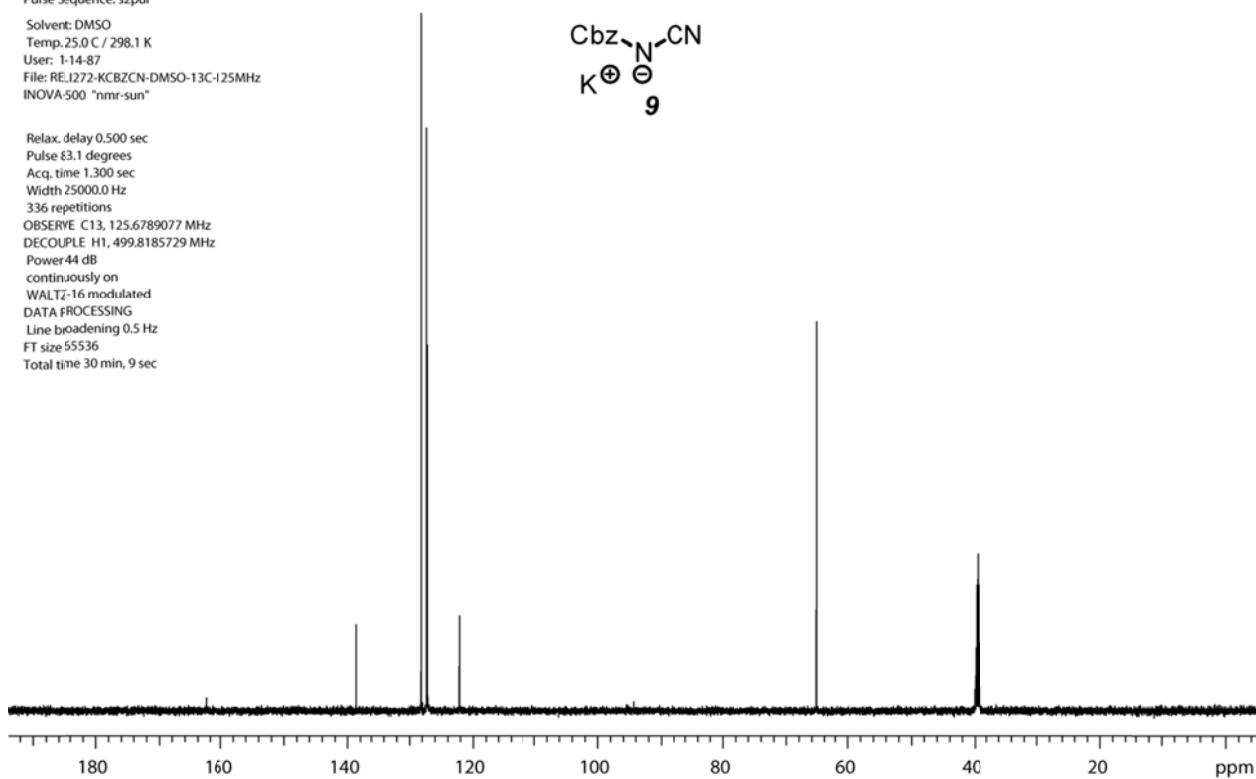

STANDARD CARBON PARAMETERS

Pulse Sequence: s2pul

Solvent: DMSO

Temp. 25.0 C / 298.1 K

File: REI1273-Bn-CBZ-guanidine-DMSO-500MHz

INOVA-500 "nmr-sun"

Pulse 33.5 degrees

Acq. time 1.892 sec

Width 4000.0 Hz

16 repetitions

OBSERVE H1, 499.8160675 MHz

DATA PROCESSING

Line broadening 0.5 Hz

FT size 12768

Total time 0 min, 30 sec

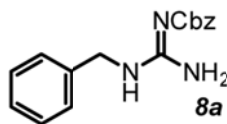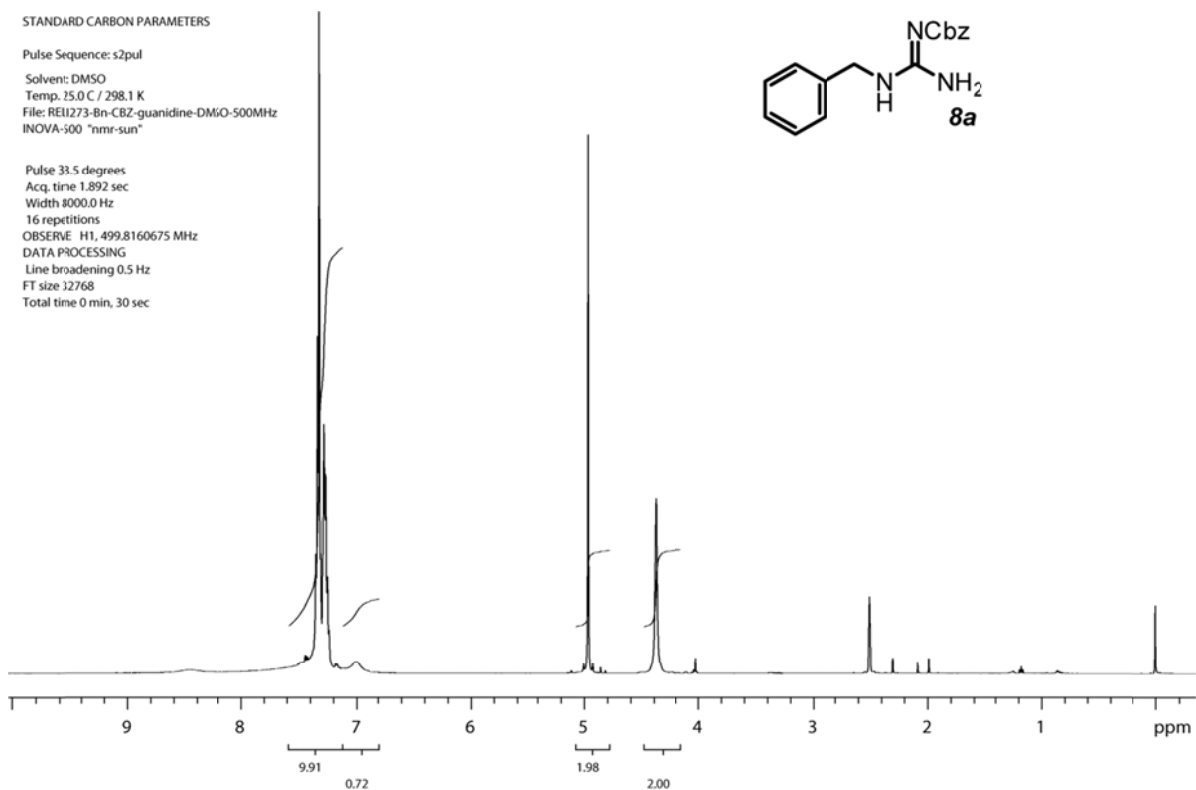

REL1274-benzyl-Cbz-guanidine-13C-125MHz

Pulse Sequence: s2pul

Solvent: DMSO

Temp. 25.0 C / 298.1 K

User: 1-14-87

File: REL1274-benzyl-Cbz-guanidine-13C-125MHz

INOVA-500 "nmr-sun"

Relax. delay 0.500 sec

Pulse 83.1 degrees

Acq. time 1.300 sec

Width 25000.0 Hz

408 repetitions

OBSERVE C13, 125.6788229 MHz

DECOUPLE H1, 499.8185729 MHz

Power 44 dB

continuously on

WALTZ-16 modulated

DATA PROCESSING

Line broadening 0.5 Hz

FT size 65536

Total time 30 min, 9 sec

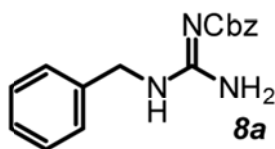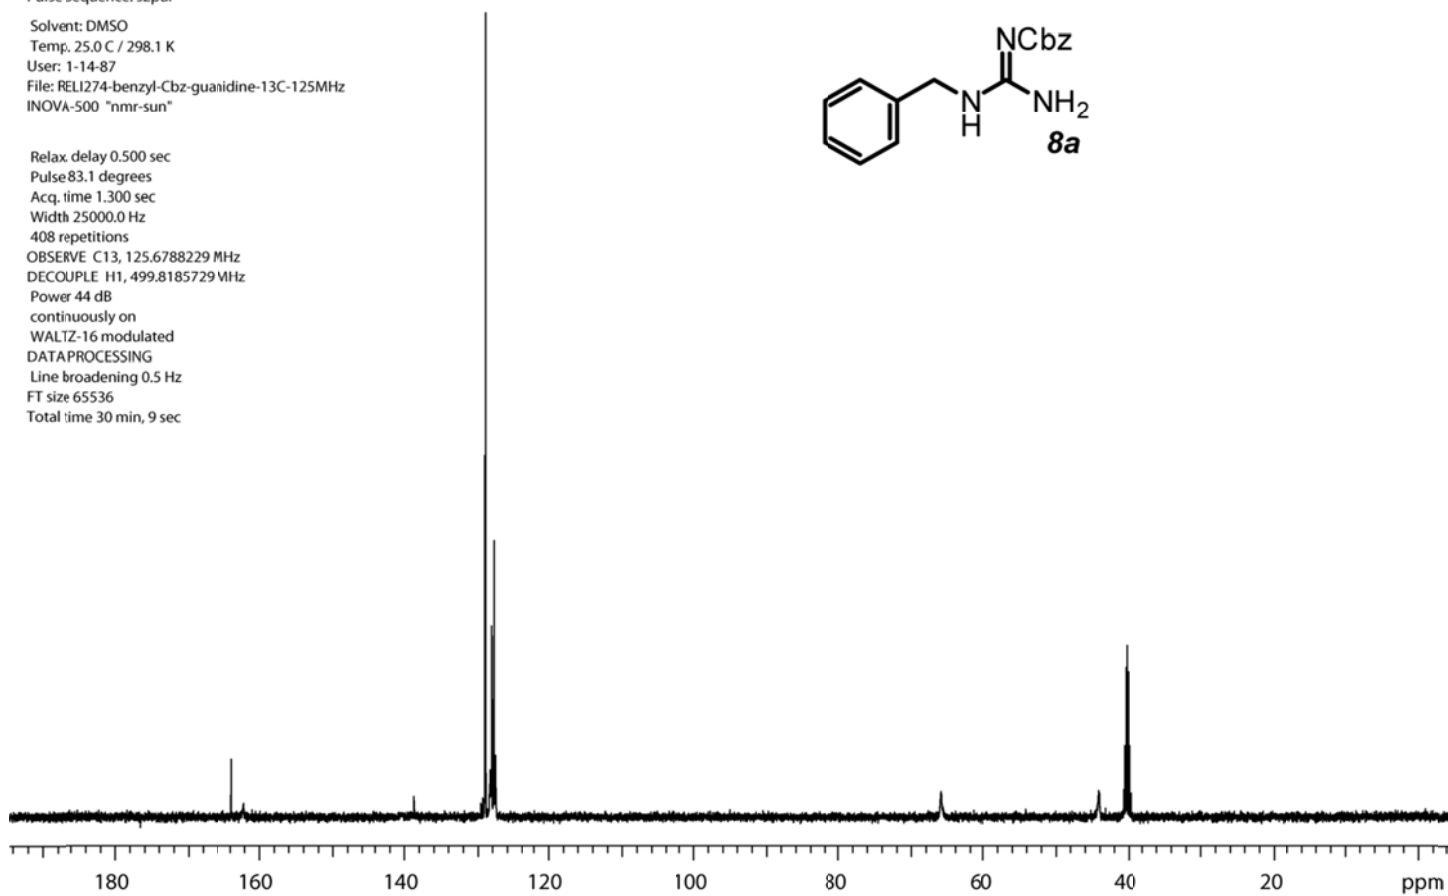

REL1275-nBu-CBZ-guanidine-1H-500MHz

Pulse Sequence: s2pul

Solvent: CDCl3

Temp: 25.0 C / 298.1 K

File: REL1275-nBu-CBZ-guanidine-1H-500MHz

INOVA-500 "nmr-sun"

Pulse 33.5 degrees

Acq. time 1.892 sec

Width 8000.0 Hz

32 repetitions

OBSERVE H1, 499.8137042 MHz

DATA PROCESSING

FT size 32768

Total time 1 min, 0 sec

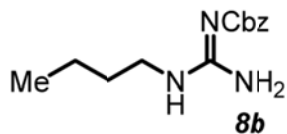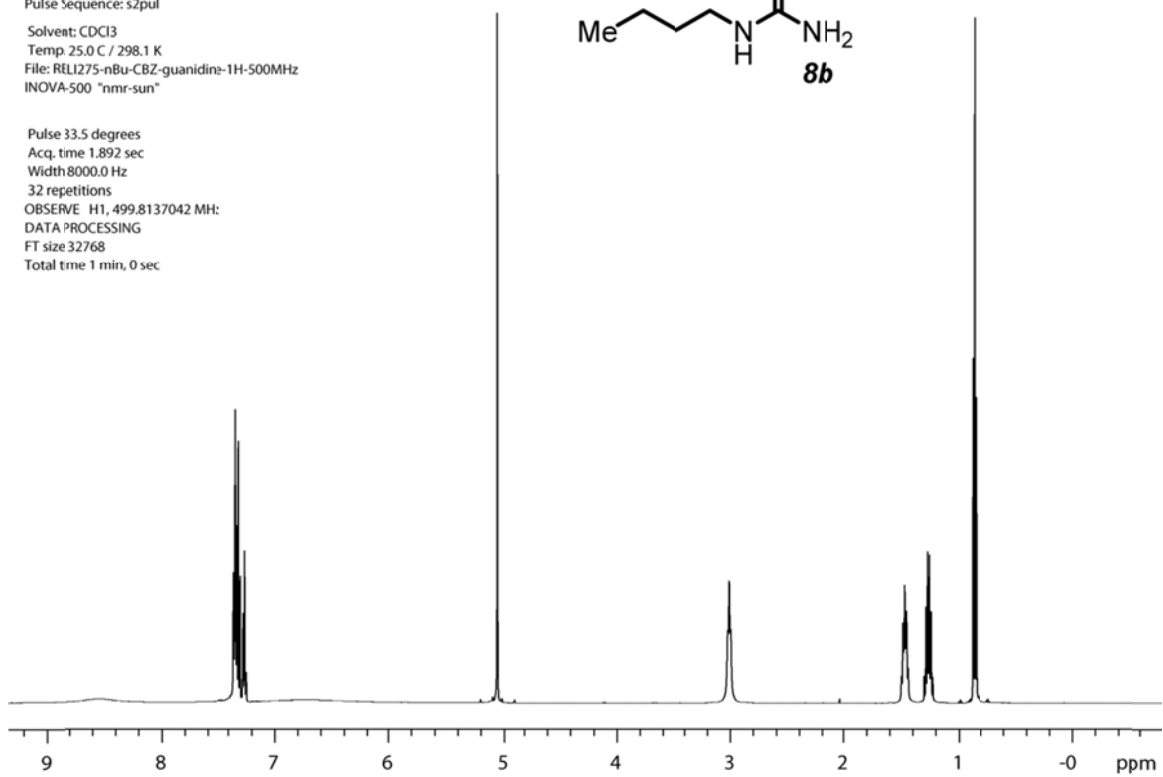

REL1275-nBuCBZ-guanidine-13C-125MHz

Pulse Sequence: s2pul

Solvent: CDCl3

Temp: 25.0 C / 298.1 K

User: 1-14-87

File: REL1275-nBu-CBZ-guanidine-13C-125MHz

INOVA-500 "nmr-sun"

Relax. delay 0.500 sec

Pulse 81.1 degrees

Acq. time 1.300 sec

Width 25000.0 Hz

79 repetitions

OBSERVE C13, 125.6782367 MHz

DECOUPLE H1, 499.8161988 MHz

Power 44 dB

continuously on

WALTZ-16 modulated

DATA PROCESSING

Line broadening 0.5 Hz

FT size 65536

Total time 30 min, 9 sec

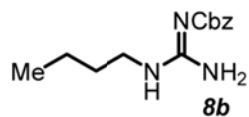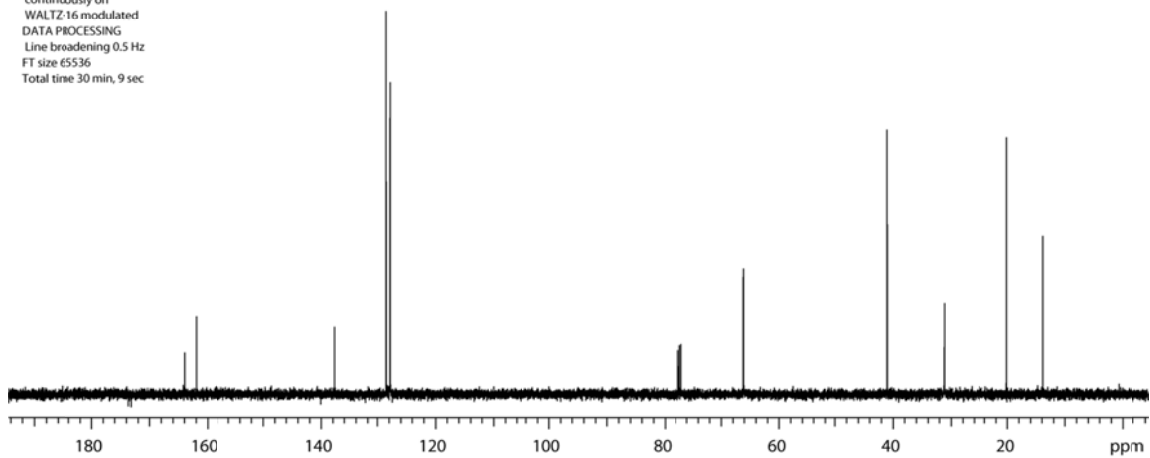

JM-01-096  
HNMR-CD3OD  
500MHz  
12-23-10

Pulse Sequence: s2pul  
Solvent: cd3od  
Temp. 25.0 C / 298.1 K  
File: JM-01-096-HNMR-CD3OD-pure-500MHz  
INOVA-500 "nmr-sun"

Pulse 34.2 degrees  
Acq. time 1.892 sec  
Width 8000.0 Hz  
152 repetitions  
OBSERVE H1, 499.8156752 MHz  
DATA PROCESSING  
FT size 32768  
Total time 31 min, 40 sec

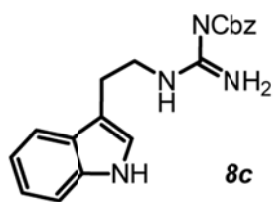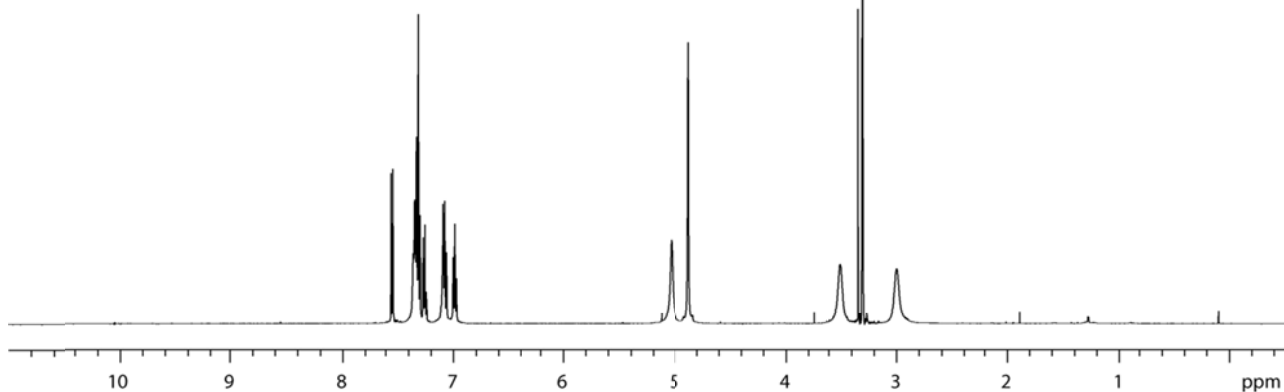

STANDARD CARBON PARAMETERS

Pulse Sequence: s2pul  
Solvent: DMSO  
Temp. 25.0 C / 298.1 K  
User: 1-14-87  
File: JM-01-096-C13NMR-DMSO-36-500MHz  
INOVA-500 "nmr-sun"

Relax. delay 0.500 sec  
Pulse 83.1 degrees  
Acq. time 1.300 sec  
Width 25000.0 Hz  
1000 repetitions  
OBSERVE C13, 125.6788229 MHz  
DECOUPLE H1, 499.8185729 MHz  
Power 44 dB  
continuously on  
WALTZ-16 modulated  
DATA PROCESSING  
Line broadening 0.5 Hz  
FT size 65536  
Total time 30 min, 9 sec

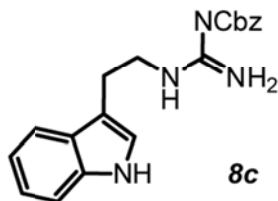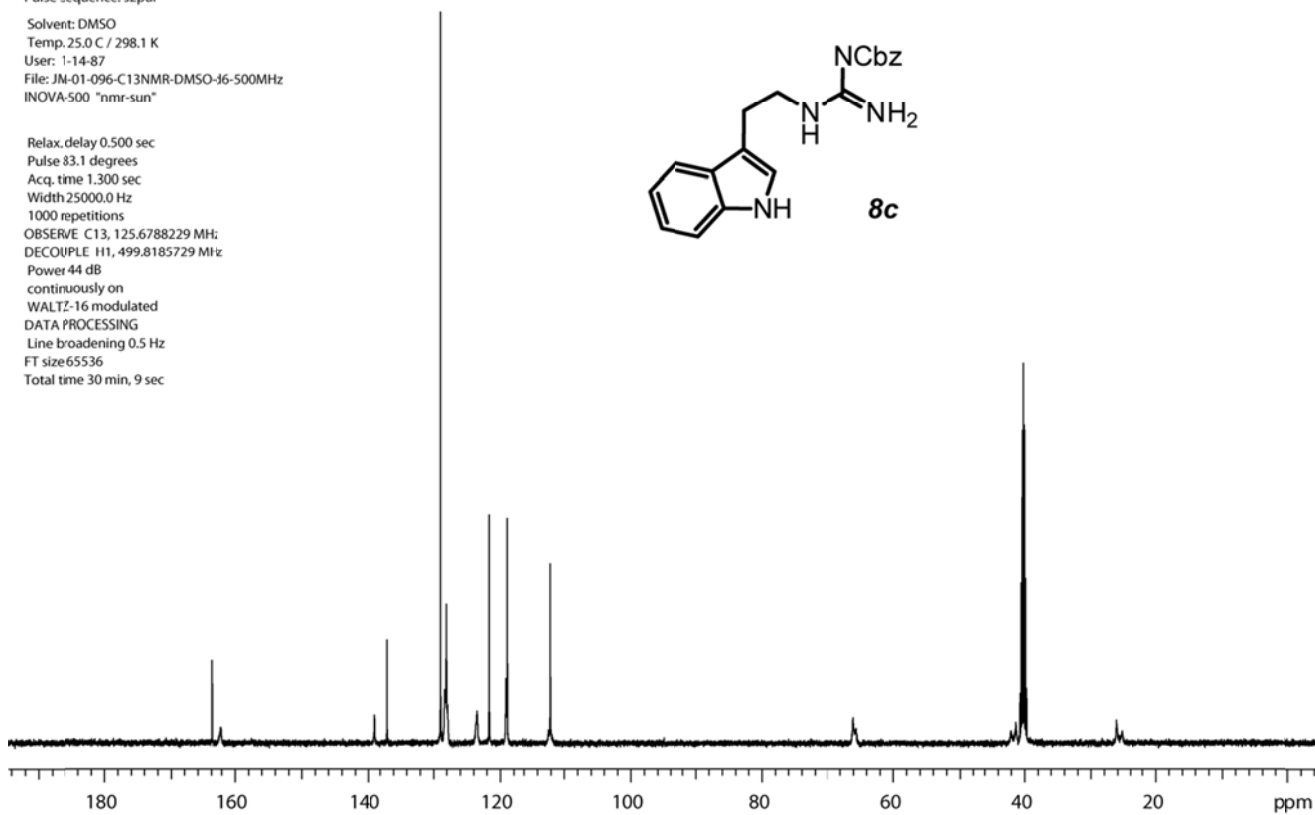

REL1274-tetrahydroisoquinoline-guanidine

Pulse Sequence: s2pul

Solvent: CDCl3

Temp. 25.0 C / 298.1 K

File: REL1274-tetrahydroisoquinoline

INOVA-500 "nmr-sun"

Pulse 33.5 degrees

Acq. time 1.892 sec

Width 8000.0 Hz

8 repetitions

OBSERVE H1, 499.8137042 MHz

DATA PROCESSING

FT size 32768

Total time 0 min, 15 sec

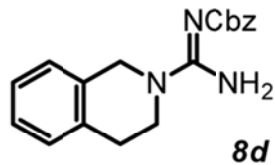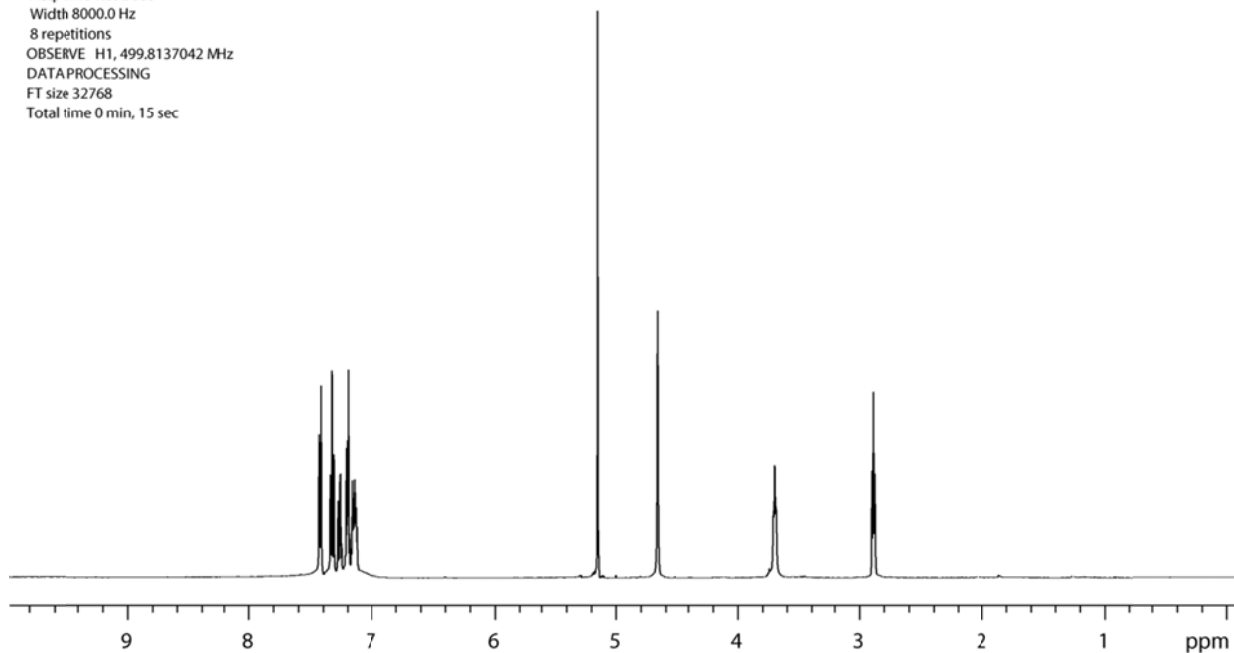

REL1274-tetrahydroisoquinolineguanidine-13C-125MHz

Pulse Sequence: s2pul

Solvent: CDCl3

Temp. 25.0 C / 298.1 K

User: 1-14-87

File: REL1274-tetrahydroisoquinoline-guanidine-13C-125MHz  
INOVA-500 "nmr-sun"

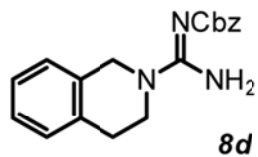

Relax. delay 0.500 sec

Pulse 33.1 degrees

Acq. time 1.300 sec

Width 25000.0 Hz

120 repetitions

OBSERVE C13, 125.6781940 MHz

DECOUPLE H1, 499.8161988 MHz

Power 44 dB

continuously on

WALTZ-16 modulated

DATA PROCESSING

Line broadening 0.5 Hz

FT size 65536

Total time 30 min, 9 sec

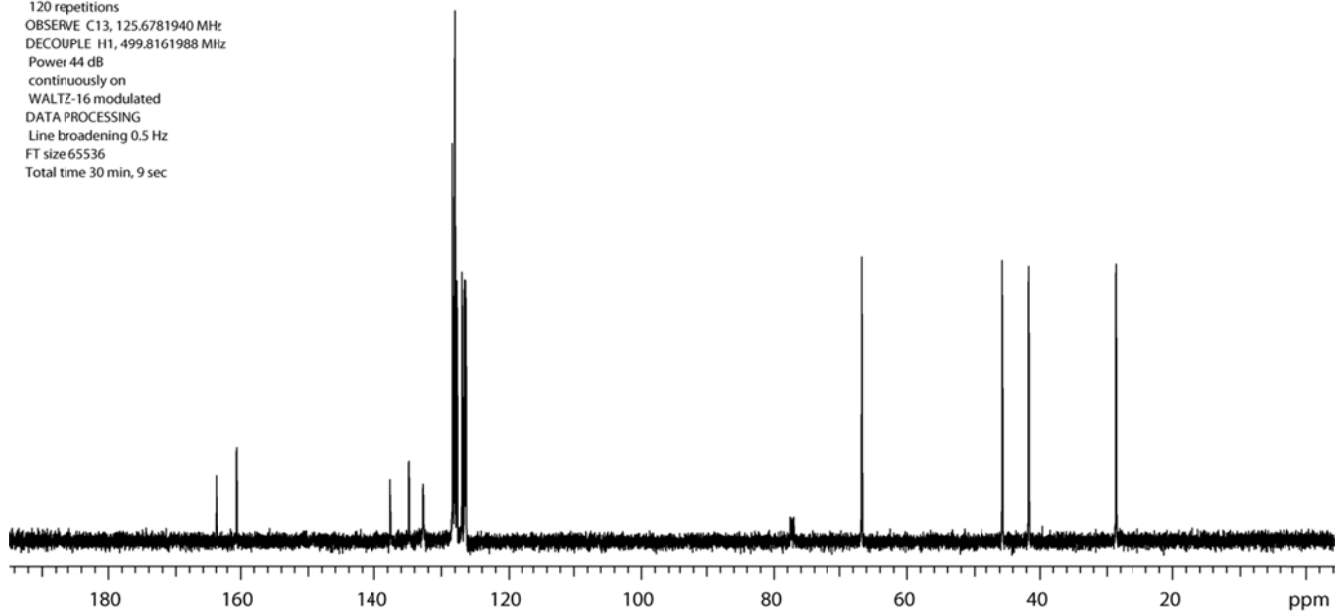



REL1226-TMS-Guanylation

Pulse Sequence: s2pul

Solvent: CDCl3

Temp. 26.0 C / 299.1 K

File: REL1226-TMS-Guanylation

INOVA-500 "nmr-sun"

Pulse 34.2 degrees

Acq. time 1.892 sec

Width 8000.0 Hz

8 repetitions

OBSERVE H1, 499.8137042 MHz

DATA PROCESSING

FT size 32768

Total time 0 min, 15 sec

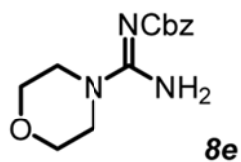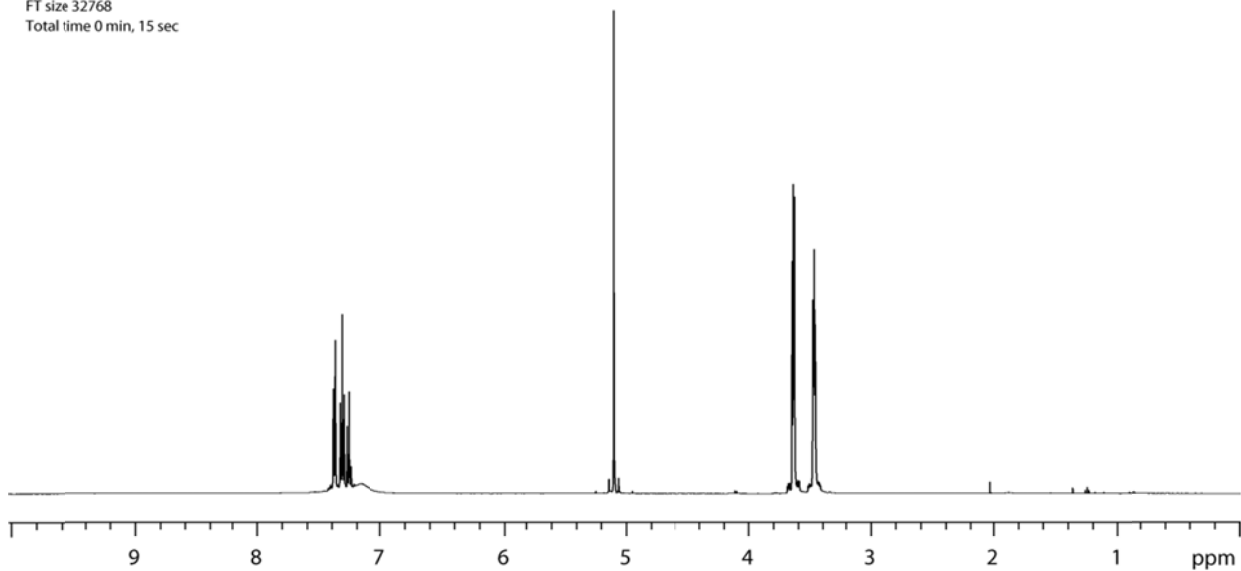

REL1226-TMS-GUANYLATION

Pulse Sequence: s2pul

Solvent: CDCl3

Temp. 26.0 C / 299.1 K

User: 1-14-87

File: REL1226-TMS-guanylation-C13

INOVA-500 "nmr-sun"

Relax. delay 1.000 sec

Pulse 83.1 degrees

Acq. time 1.300 sec

Width 25000.0 Hz

128 repetitions

OBSERVE C13, 125.6782382 MHz

DECUPLE H1, 499.8161988 MHz

Power 44 dB

continuously on

WALTZ-16 modulated

DATA PROCESSING

Line broadening 0.5 Hz

FT size 65536

Total time 38 min, 29 sec

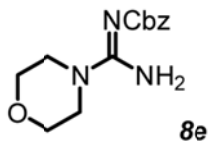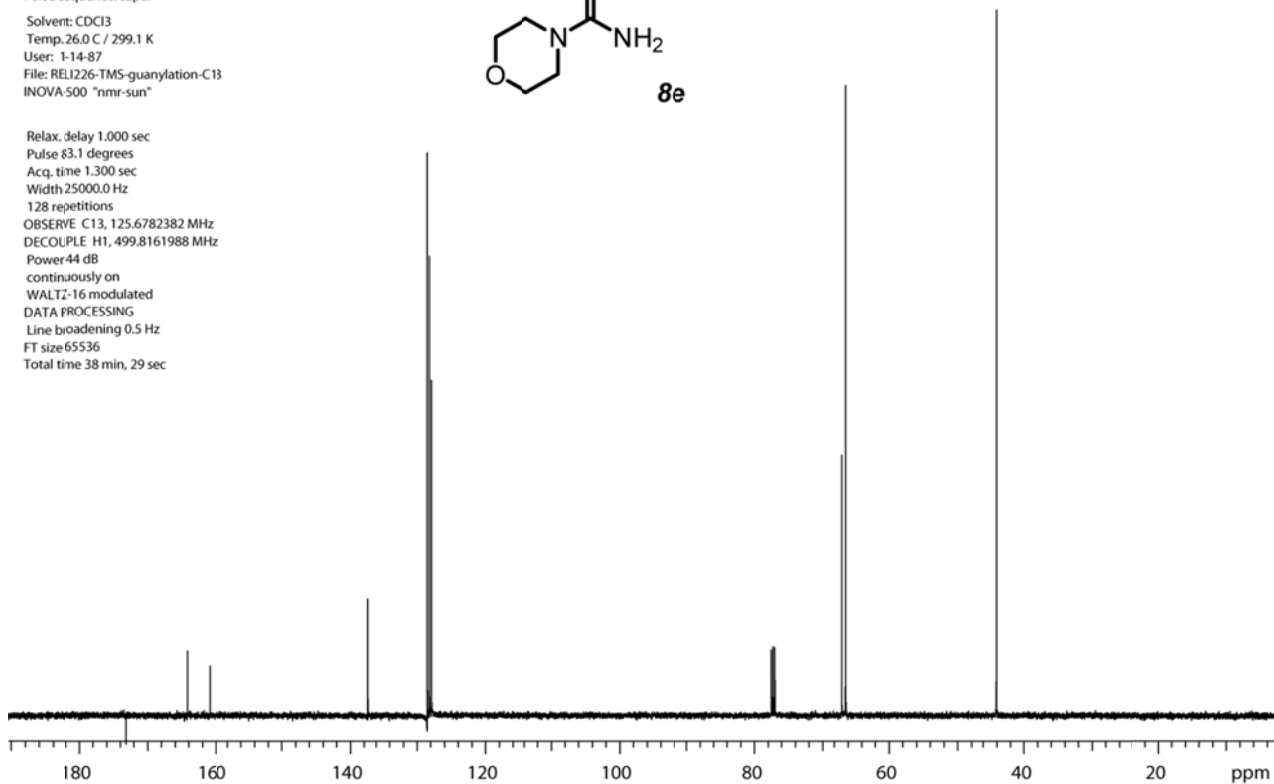

REL1227-pyrrolidine

Pulse Sequence: s2pul

Solvent: CDCl3

Temp. 26.0 C / 299.1 K

File: REL1227-pyrrolidine-500

INOVA-500 "nmr-sun"

Pulse 34.2 degrees

Acq. time 1.892 sec

Width 8000.0 Hz

8 repetitions

OBSERVE H1, 499.8137042 MHz

DATA PROCESSING

FT size 32768

Total time 0 min, 15 sec

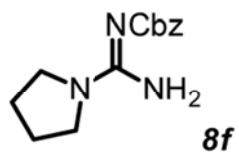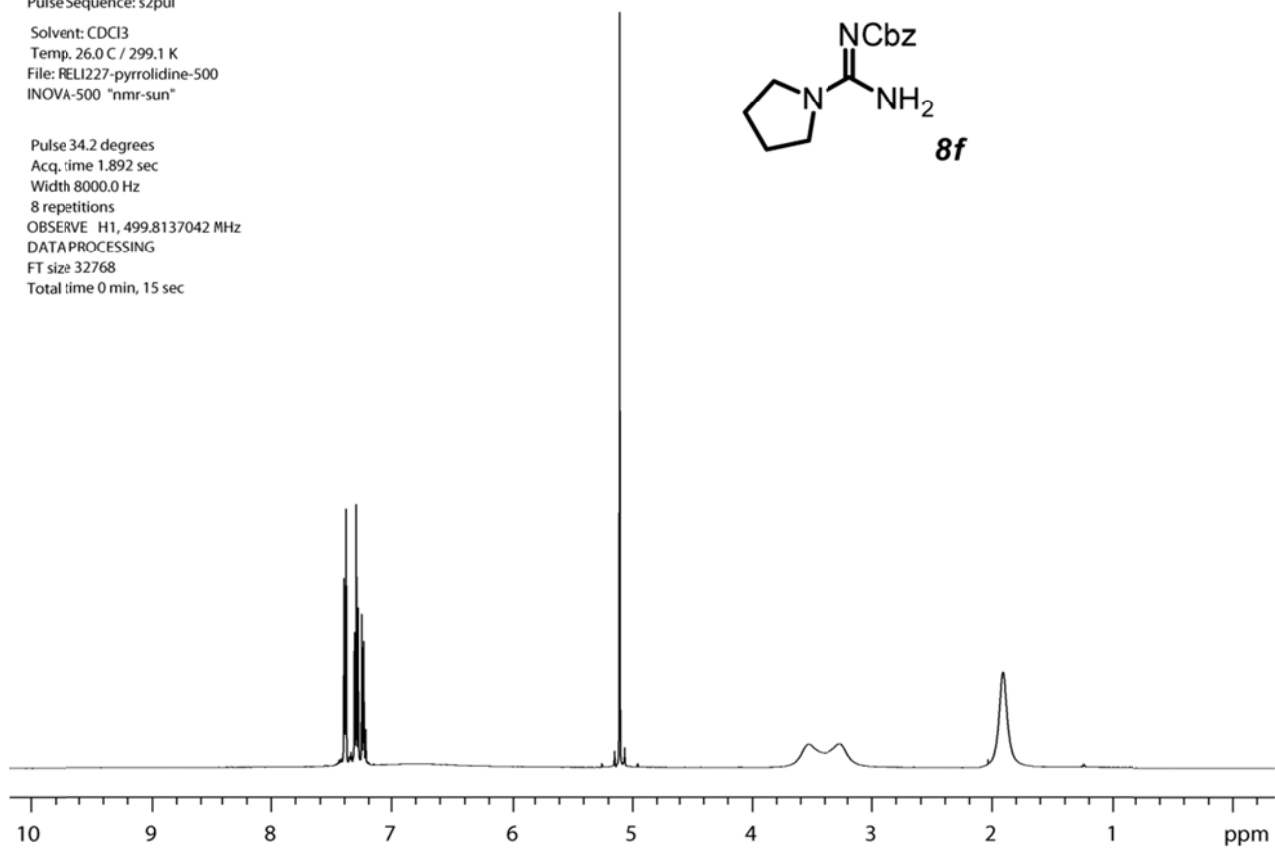

REL1227-pyrrolidine-C13-100MHZ

Pulse Sequence: s2pul

Solvent: CDCl3

Temp. 26.0 C / 299.1 K

Operator: rlooper

File: REL1227-pyrrolidine-C13-100MHZ

INNOVA-500 "nmr-sun"

Relax. delay 1.000 sec

Pulse 111.4 degrees

Acq. time 1.199 sec

Width 25000.0 Hz

336 repetitions

OBSERVE C13, 100.5578177 MHz

DECOUPLE H1, 399.9135467 MHz

Power 35 dB

continuously on

WALTZ-16 modulated

DATA PROCESSING

Line broadening 1.0 Hz

FT size 65536

Total time 37 min, 41 sec

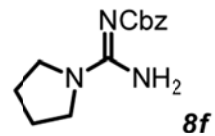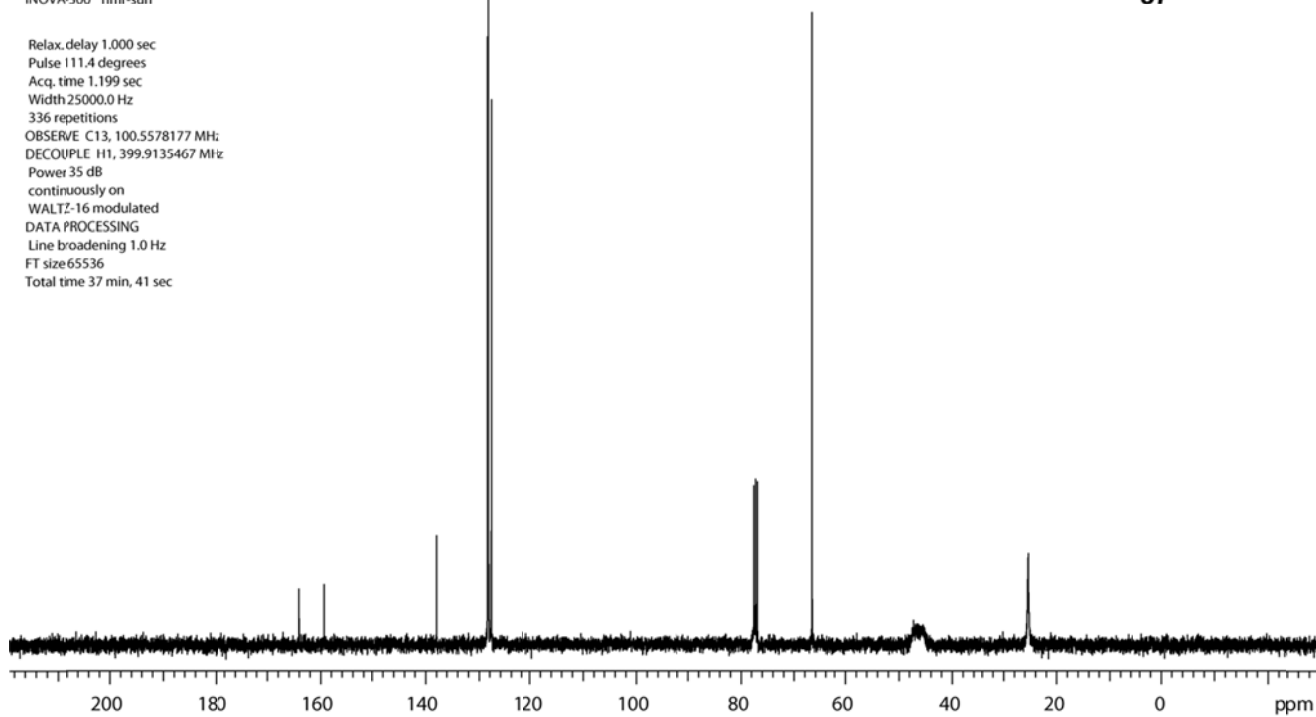

REL1227-Diisopropyl-guanylation

Archive directory: /home/nmr/nmr1/vnmrsys/data  
File: REL1227-Diisopropylamine-1H

Pulse Sequence: s2pul

Solvent: CDCl3

Ambient temperature

File: REL1227-Diisopropylamine-1H

INOVA-500 "nmr-sun"

Relax. delay 1.000 sec

Pulse 46.7 degrees

Acq. time 4.000 sec

Width 4499.9 Hz

8 repetitions

OBSERVE H1, 300.0771388 MH:

DATA PROCESSING

FT size 65536

Total time 0 min, 40 sec

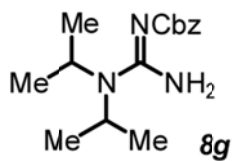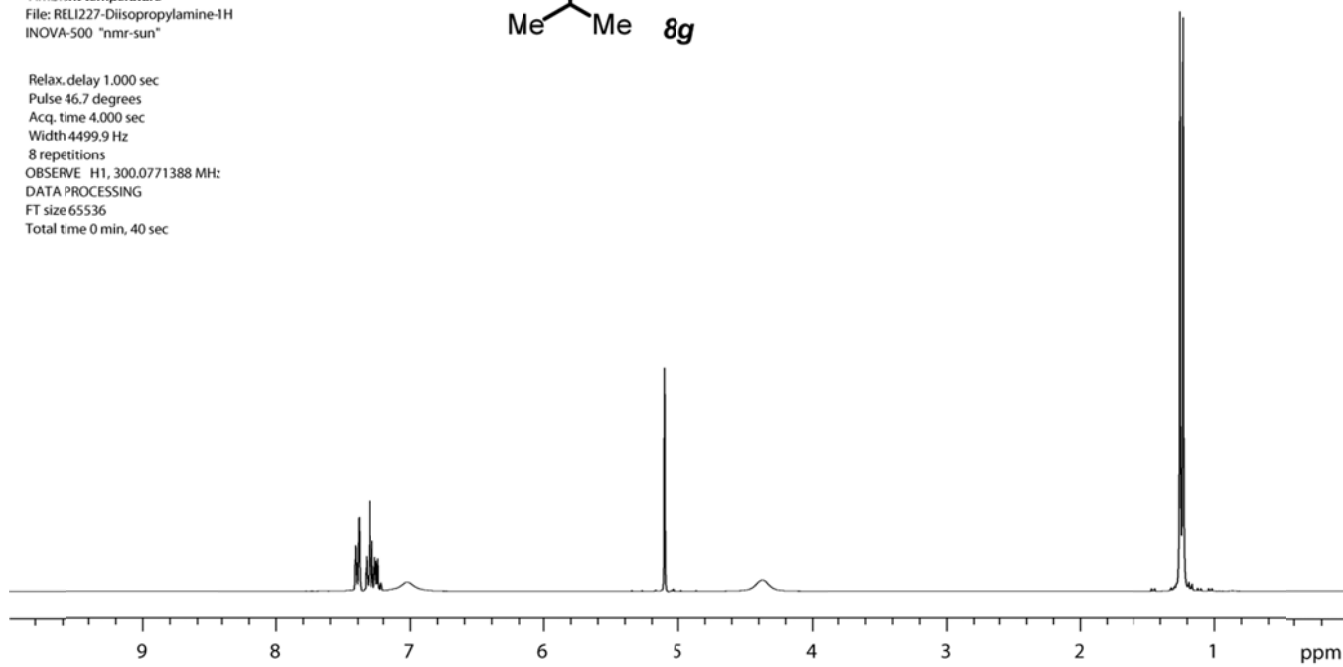

Pulse Sequence: s2pul

Solvent: CDCl3

Ambient temperature

File: REL1227-Diisopropylamine-C13-75

INOVA-500 "nmr-sun"

Pulse 41.7 degrees

Acq. time 1.815 sec

Width 16501.7 Hz

168 repetitions

OBSERVE C13, 75.454433 MHz

DECOUPLE H1, 300.0782156 MHz

Power 37 dB

continuously on

WALTZ-16 modulated

DATA PROCESSING

Line broadening 1.0 Hz

FT size 65536

Total time 31 min, 7 sec

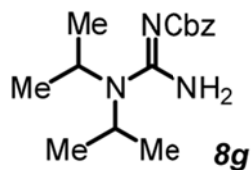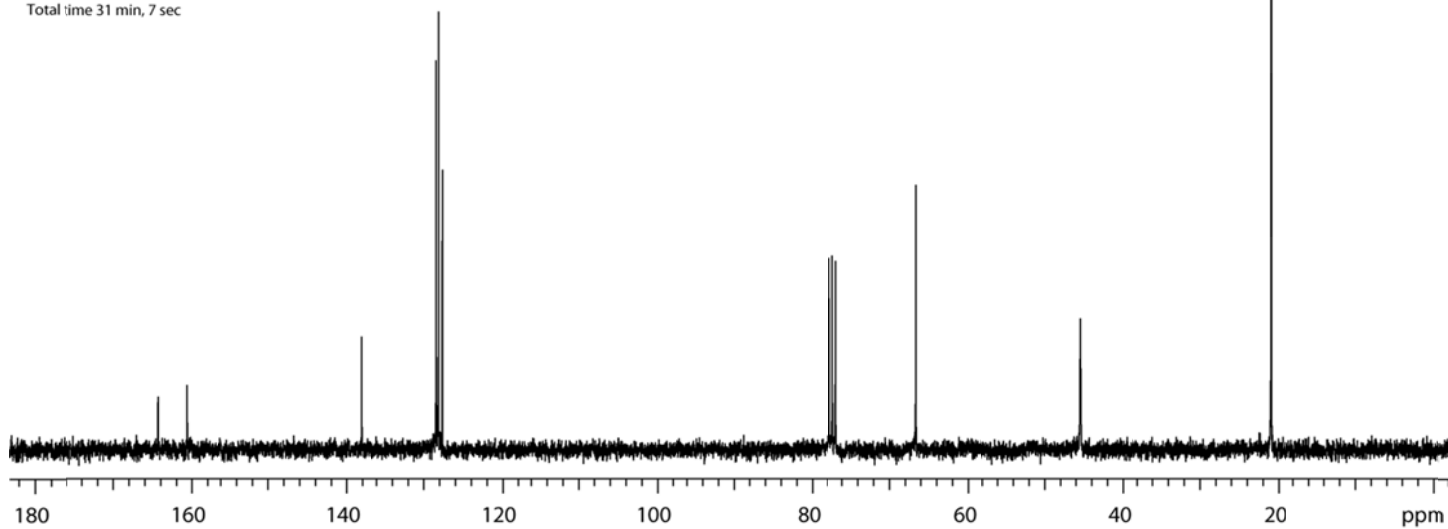

REL1227-Anisidine-guanylation

Archive directory: /home/nmr/vnmr1/vnmrsys/data  
File: REL1227-anisidine-1H-300

Pulse Sequence: s2pul

Solvent: CDCl3  
Ambient temperature  
File: REL1227-anisidine-1H-300  
INOVA-500 "nmr-sun"

Relax. delay 1.000 sec  
Pulse +6.7 degrees  
Acq. time 4.000 sec  
Width 4499.9 Hz  
8 repetitions  
OBSERVE H1, 300.0771388 MHz  
DATA PROCESSING  
FT size 65536  
Total time 0 min, 40 sec

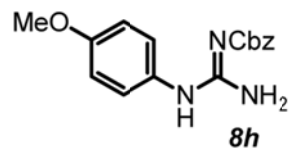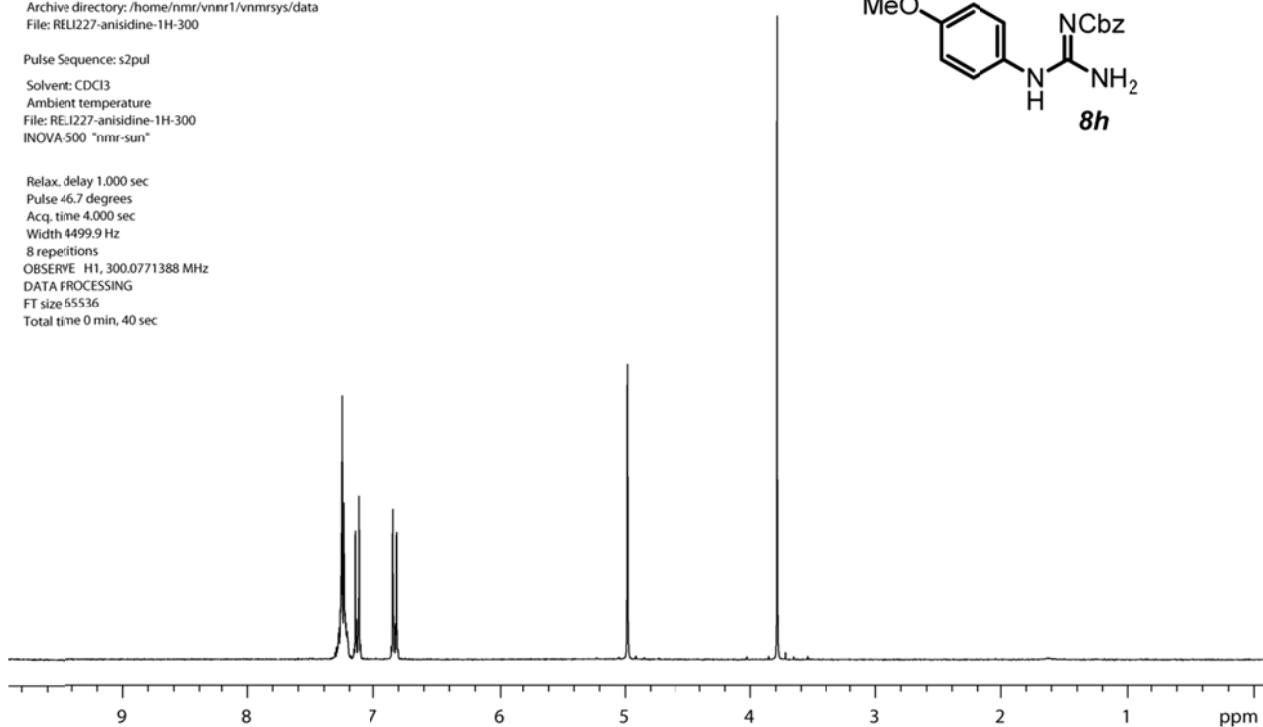

REL1227-Anisidine-guanylation

Pulse Sequence: s2pul

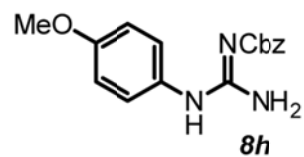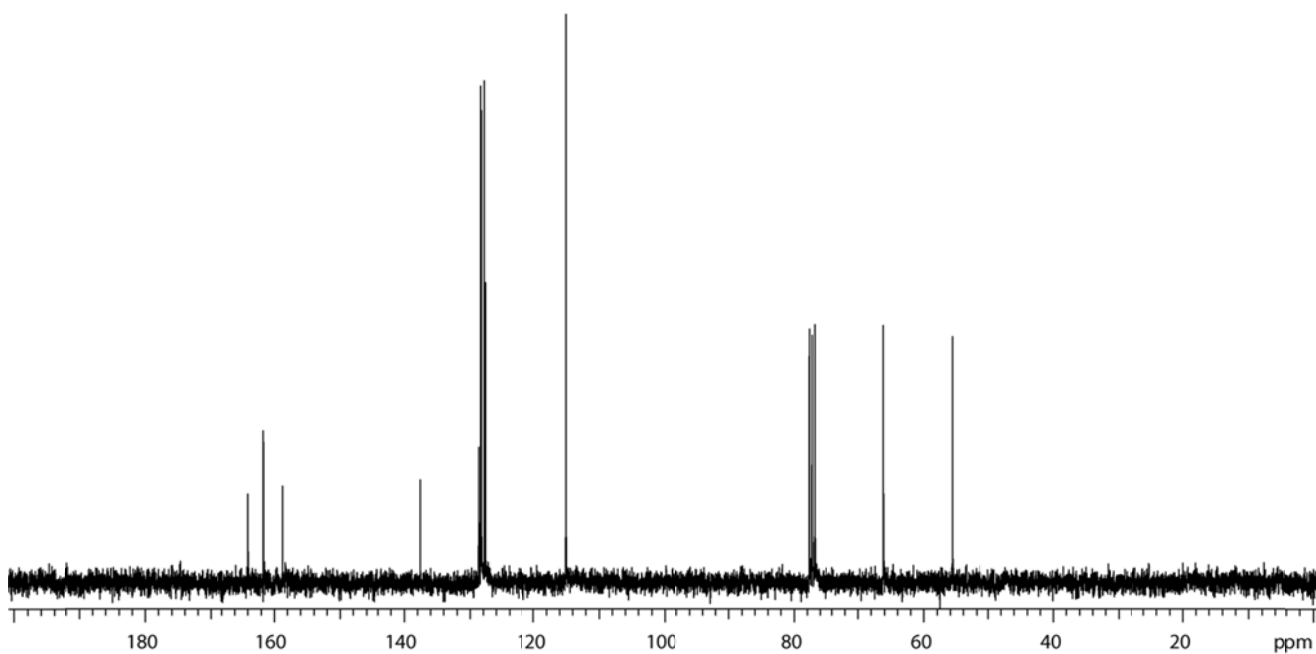

JM-01-105  
HNMR-CDCl3  
500MHz  
06-02-11

Pulse Sequence: s2pul

Solvent: CDCl3  
Temp. 25.0 C / 298.1 K  
File: JM-01-105-HNMR-CDCl3-500MHz  
INOVA-500 "nmr-sun"

Pulse 33.5 degrees  
Acq. time 1.892 sec  
Width 8000.0 Hz  
94 repetitions  
OBSERVE H1, 499.8137056 MHz  
DATA PROCESSING  
FT size 32768  
Total time 5 hr, 16 min, 48 sec:

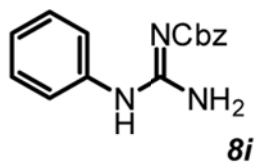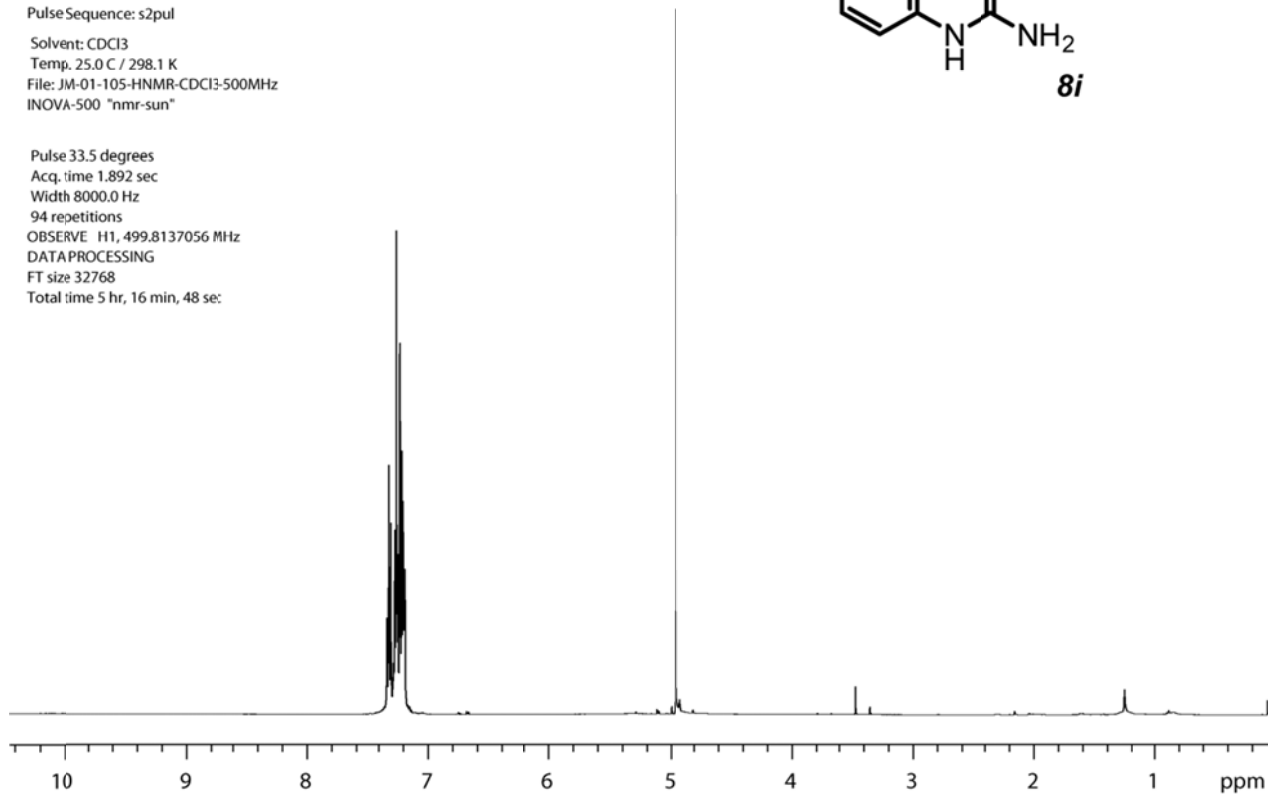

STANDARD CARBON PARAMETERS

Pulse Sequence: s2pul  
Solvent: CDCl3  
Temp. 25.0 C / 298.1 K  
User: 1-14-87  
File: JM-01-105-C13NMR-CDCl3 500MHz  
INNOVA-500 "nmr-sun"

Relax. delay 1.000 sec  
Pulse 33.1 degrees  
Acq. time 1.300 sec  
Width 25000.0 Hz  
316 repetitions  
OBSERVE C13, 125.6782321 MHz  
DECOUPLE H1, 499.8161988 MHz  
Power 44 dB  
continuously on  
WALTZ-16 modulated  
DATA PROCESSING  
Line broadening 0.5 Hz  
FT size 65536  
Total time 6 hr, 24 min, 53 sec

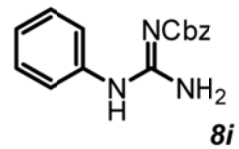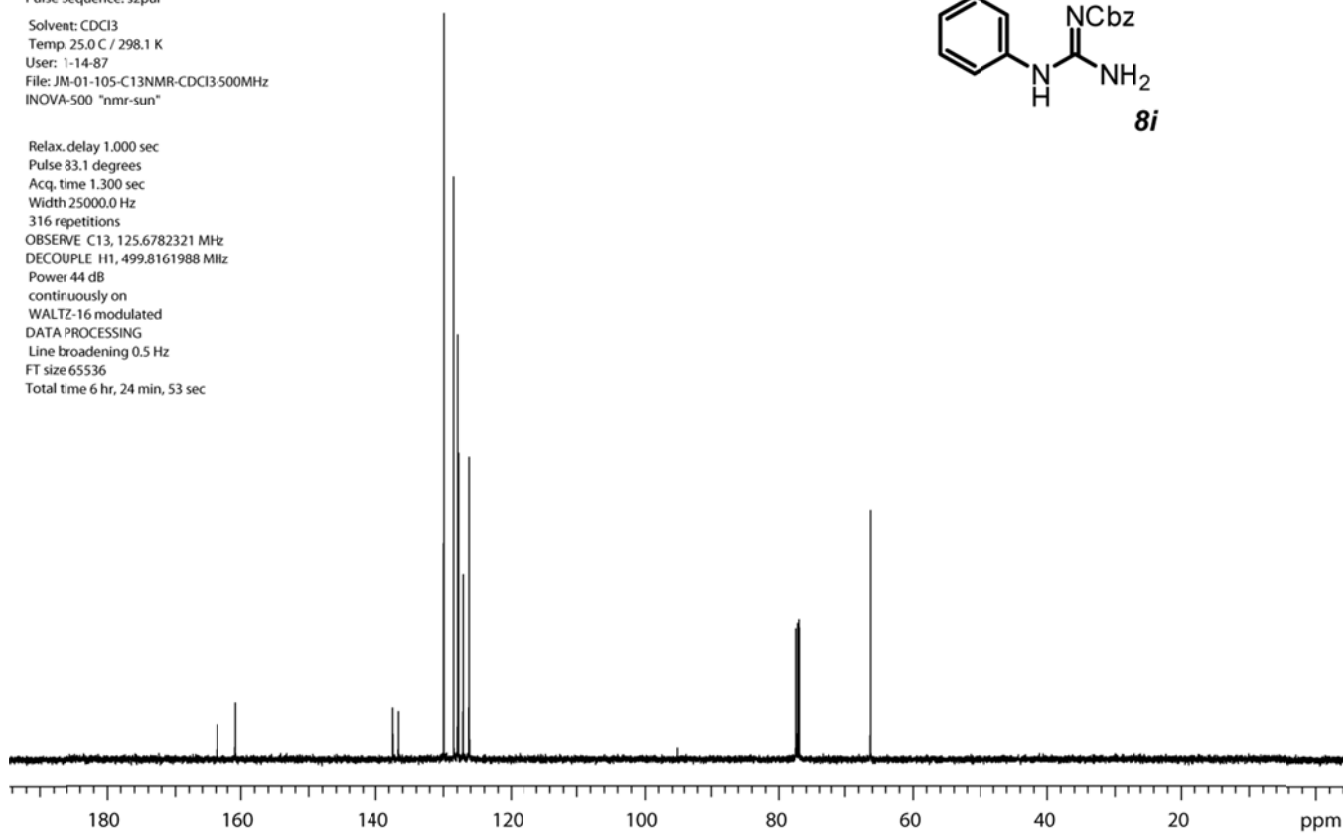



REL1227-N-Me-aniline

Pulse Sequence: s2pul

Solvent: CDCl3

Temp: 26.0 C / 299.1 K

File: REL1227-N-Me-aniline-500  
INOVA-500 "nmr-sun"

Pulse 34.2 degrees

Acq. time 1.892 sec

Width 8000.0 Hz

8 repetitions

OBSERVE H1, 499.8137042 MHz

DATA PROCESSING

FT size 32768

Total time 0 min, 15 sec

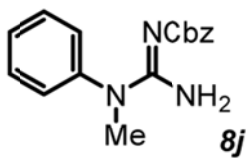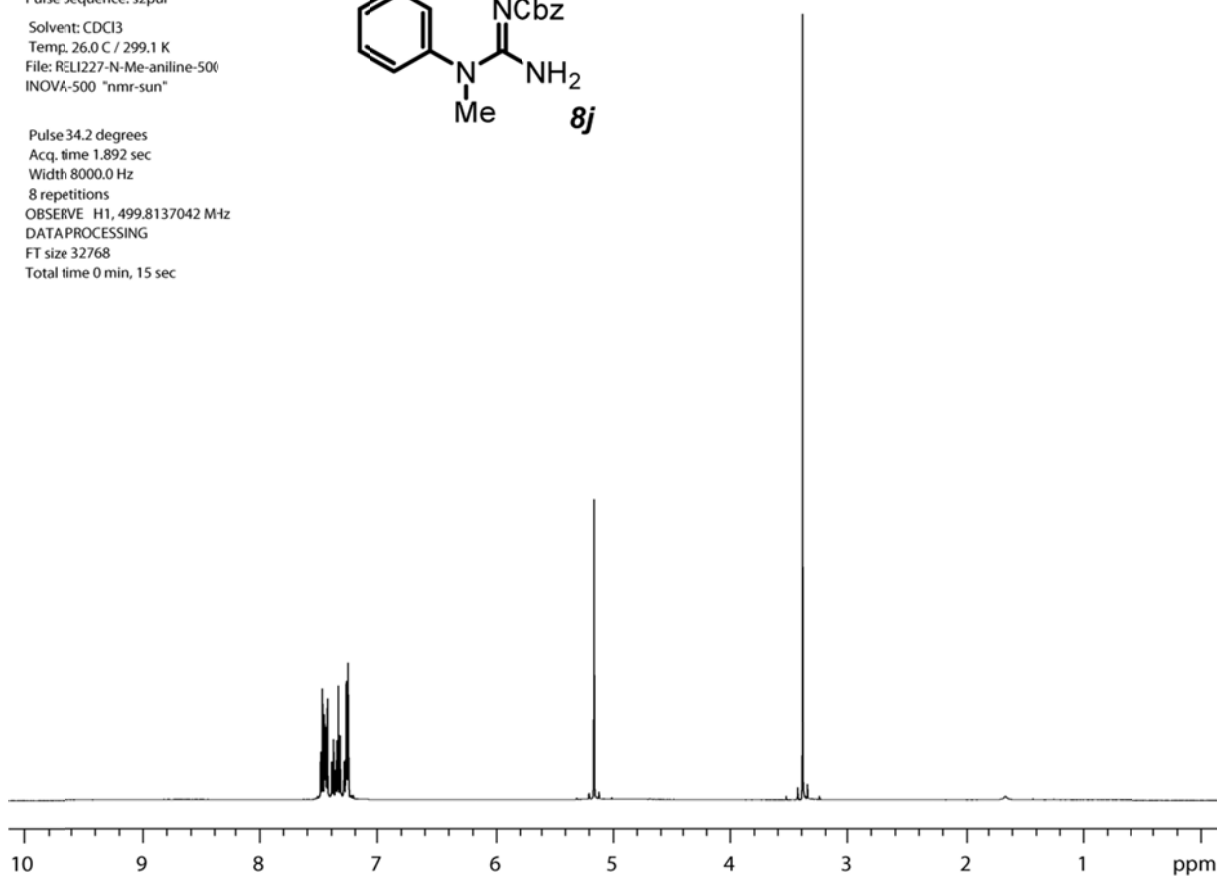

REL1227-N-Me-aniline-13C-100MHz

Pulse Sequence: s2pul

Solvent: CDCl3

Temp: 26.0 C / 299.1 K

Operator: flooper

File: REL1227-N-Me-aniline-13C-100MHz  
INOVA-500 "nmr-sun"

Relax. delay 1.000 sec

Pulse 111.4 degrees

Acq. time 1.199 sec

Width 25000.0 Hz

72 repetitions

OBSERVE C13, 100.5578329 MHz

DECOUPLE H1, 399.9135467 MHz

Power 35 dB

continuously on

WALTZ-16 modulated

DATA PROCESSING

Line broadening 1.0 Hz

FT size 55536

Total time 37 min, 41 sec

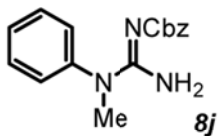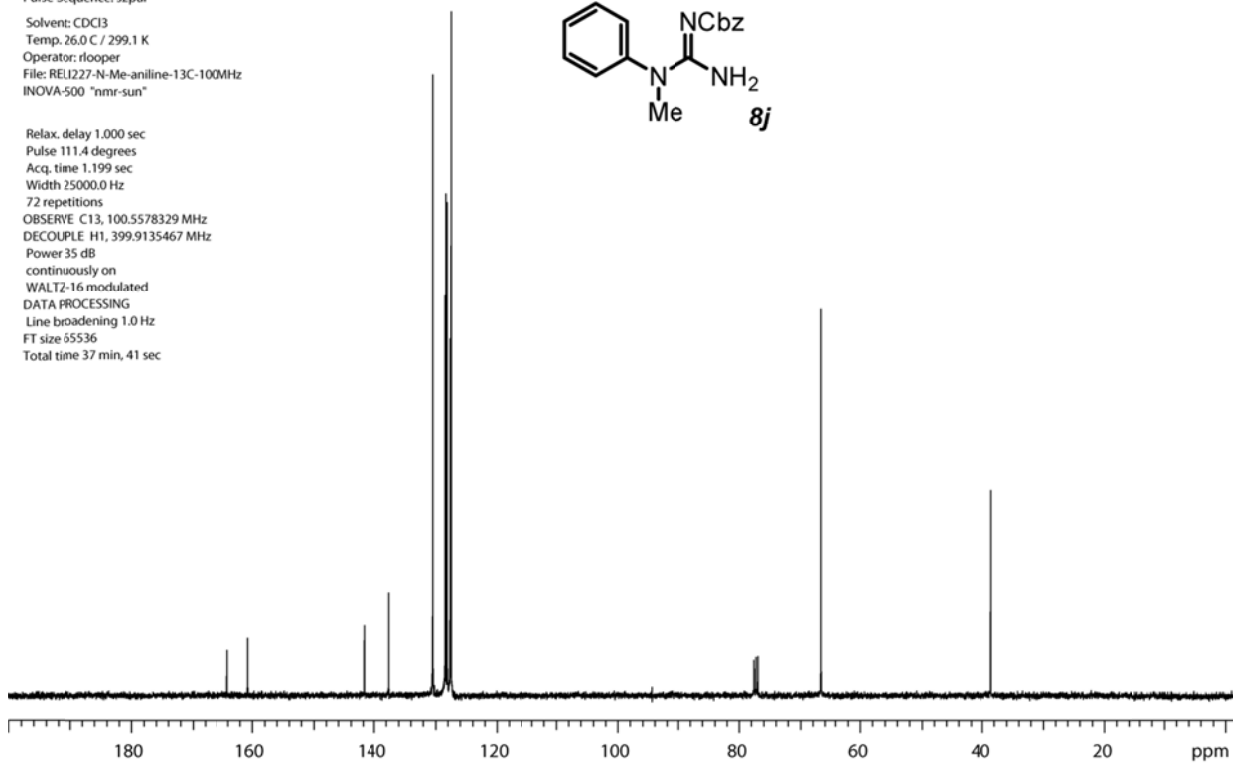

REL1275-3F-CBZ-guanidine-1H-500MHz-2

Pulse Sequence: s2pul

Solvent: CDCl3

Temp: 25.0 C / 298.1 K

File: REL1275-3F-CBZ-guanidine-500MHz-2  
INOVA-500 "nmr-sun"

Pulse 33.5 degrees

Acq. time 1.892 sec

Width 8000.0 Hz

32 repetitions

OBSERVE H1, 499.8137042 MHz

DATA PROCESSING

FT size 32768

Total time 1 min, 0 sec

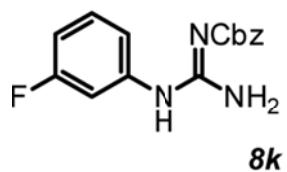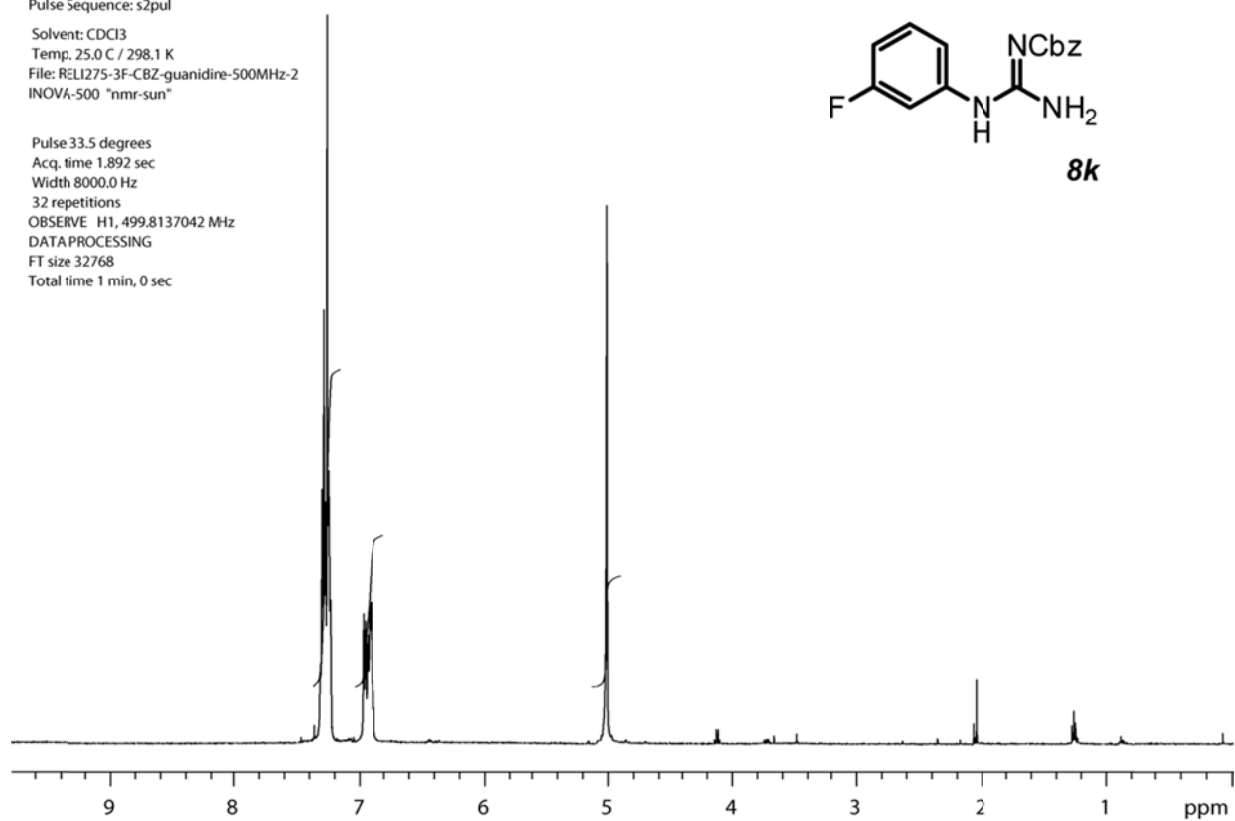

REL1275-3F-CBZ-guanidine-13C-125MHz

Pulse Sequence: s2pul

Solvent: CDCl3

Temp. 25.0 C / 298.1 K

User: 1-14-87

File: REL1275-3F-CBZ-guanidine-13C-125MHz  
INOVA-500 "nmr-sun"

Relax. delay 0.500 sec

Pulse 83.1 degrees

Acq. time 1.300 sec

Width 25000.0 Hz

612 repetitions

OBSERVE C13, 125.6782352 MHz

DECOUPLE H1, 499.8161988 MHz

Power 44 dB

continuously on

WALTZ-16 modulated

DATA PROCESSING

Line broadening 0.5 Hz

FT size 65536

Total time 30 min, 9 sec

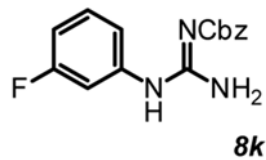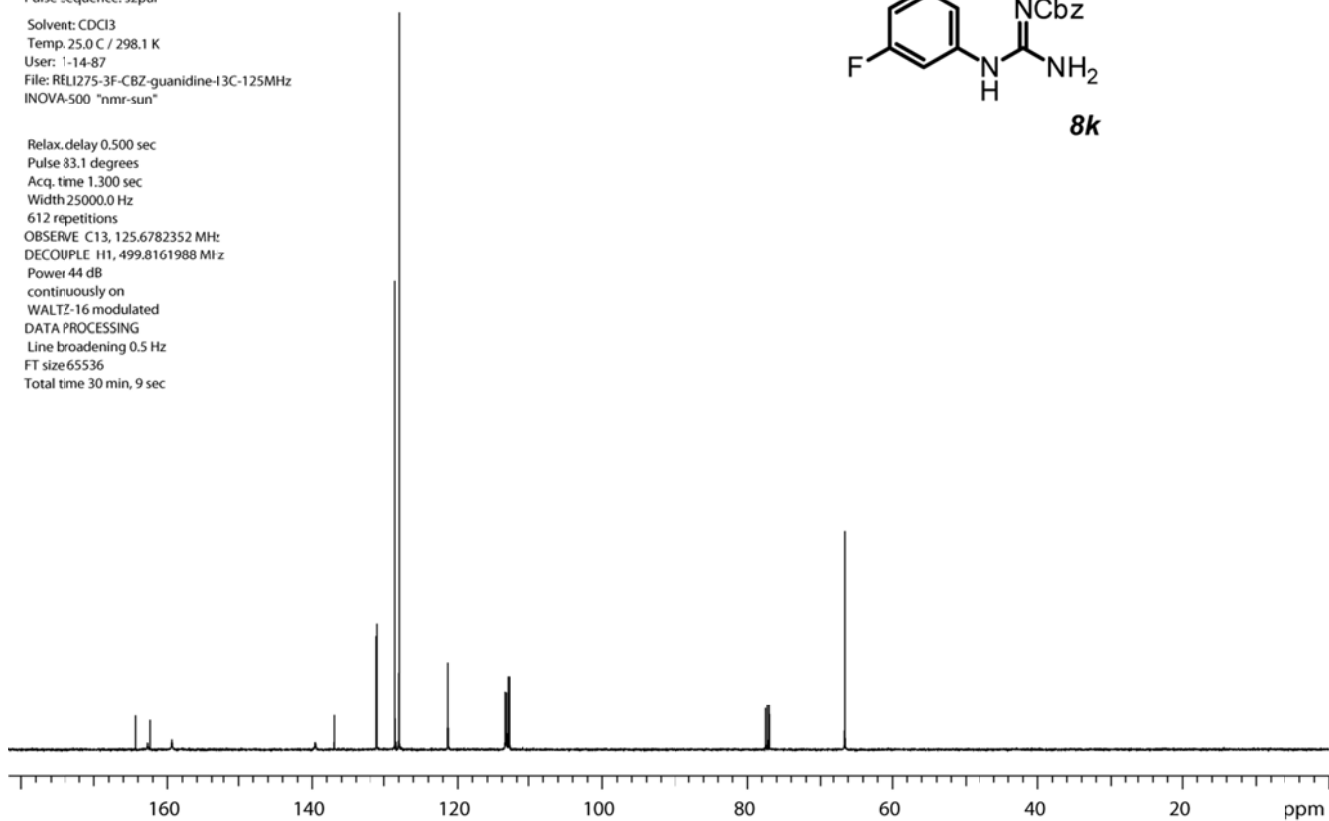

Supplement: NIHMS310712-supplement-1_si_001.pdf [file NIHMS310712-supplement-1_si_001.pdf]
